# Supplementary material for: Environmental DNA reveals that rivers are conveyer belts of biodiversity information
Source: PubMed Central journal article supplement (PMC5013555; doi:10.1038/ncomms12544), 2016-08-30
Supplement: ncomms12544-s1.pdf [file ncomms12544-s1.pdf]

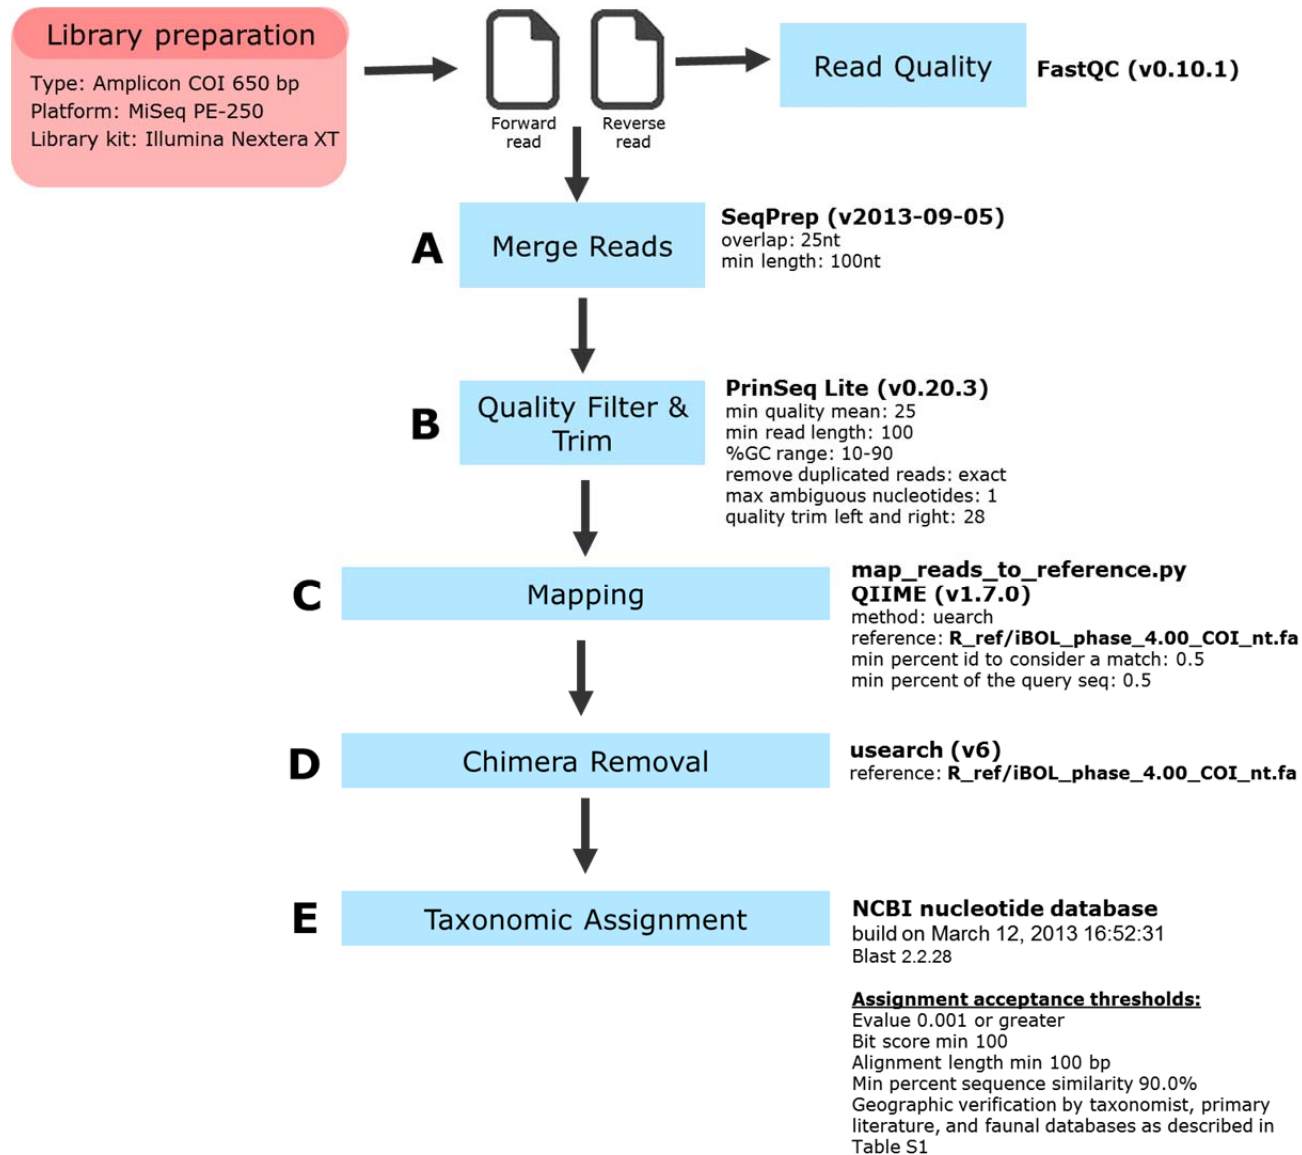

- 1 **Supplementary Figure 1:** Bioinformatic workflow for each step of filtering and parameters used in the various programs. Program
- 2 citations are in the methods section. Minimum is abbreviated ‘min’ and base pair is abbreviated ‘bp’.



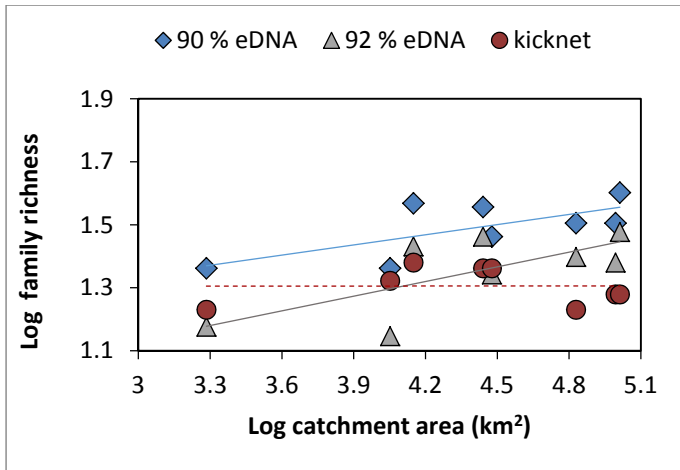

10

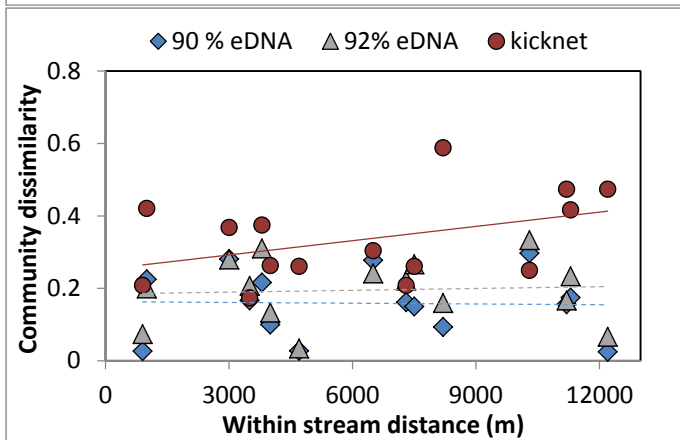

11

12 **Supplementary Figure 3:** Figure 2 from main text, but now depicted at two levels of bioinformatic  
 13 stringency applied to eDNA metabarcoding estimated richness (i.e., 90 % similarity in assignment  
 14 and 92 % similarity in assignment used as threshold for accepting a taxonomic name). a) Change in  
 15 species richness relative to catchment area. Both axes were log transformed to illustrate their linear  
 16 relationship. b) Change in beta diversity with respect to steam distance. All beta values for the three  
 17 response variables (90 % eDNA, 92 % eDNA and kicknet) were recalculated using  $\beta_2$  for estimating  
 18 beta diversity instead of the Jaccard method for estimating beta diversity because this is more  
 19 appropriate given the false negative signal generated by the removal of data.

20 **Supplementary Table 1:** Macroinvertebrate families that were captured in kicknet samples, but  
 21 were not considered detected by environmental DNA due to bioinformatic thresholds set for  
 22 accepting an assignment

| Family           | # Genbank sequences | a   | ab | b  | c | cd | d  | e  | f  | Total | Average % similarity | Average assignment length |
|------------------|---------------------|-----|----|----|---|----|----|----|----|-------|----------------------|---------------------------|
| Aphelocheiridae  | 12                  |     |    |    |   |    |    |    |    | 0     | NA                   | NA                        |
| Caenidae         | 277                 |     | 22 |    |   |    |    | 6  |    | 28    | 76.4                 | 213.5                     |
| Calopterygidae   | 381                 |     |    | 1  |   |    |    | 1  |    | 2     | 94.1                 | 42.0                      |
| Dugesiidae       | 204                 | 24  |    | 14 | 5 |    | 5  | 14 | 20 | 82    | 94.3                 | 50.9                      |
| Gomphidae        | 680                 | 1   | 29 |    | 6 | 1  | 7  | 1  | 9  | 54    | 90.3                 | 67.8                      |
| Hydroptilidae    | 2081                | 513 | 3  |    | 4 | 3  | 3  | 3  | 76 | 605   | 86.8                 | 105.5                     |
| Hydracarina      | 1394                |     | 1  | 1  |   |    | 24 | 3  | 6  | 35    | 93.9                 | 113.6                     |
| Lepidostomatidae | 844                 | 27  | 3  | 21 | 8 |    | 5  | 10 | 9  | 83    | 83.2                 | 82.2                      |
| Limoniidae       | 2053                |     |    | 1  |   | 1  |    | 1  |    | 3     | 82.1                 | 132.7                     |
| Odontoceridae    | 263                 |     |    |    |   | 2  |    |    |    | 2     | 81.8                 | 103.5                     |
| Platycnemididae  | 153                 |     |    | 2  | 3 | 1  |    |    |    | 6     | 82.3                 | 145.2                     |
| Potamanthidae    | 6                   |     |    |    |   |    |    |    |    | 0     | NA                   | NA                        |
| Sericostomatidae | 32                  |     | 9  |    | 2 | 31 |    |    |    | 42    | 86.6                 | 80.7                      |

23 For each Macroinvertebrate family detected by the kicknet we list the number of sequences matching this family for  
 24 cytochrome c oxidase I (COI) on Genbank (# Genbank sequences), the number of sequences that were identified but  
 25 excluded at each site (a, ab, b, c, cd, d, e, and f) as well as their total across all eight site. We report the average  
 26 similarity of the sequence matches to Genbank sequences, and the average assignment length of these sequences per  
 27 family. Based on accepting assignments when these two variables met the criteria of a length greater than 100 bp and  
 28 percent similarity greater than 90 %, Therefore, we have evidence that at least 11 of the 13 families found in the kicknet  
 29 were not considered detected even though they exist in our dataset. This represents our known our false absence rate  
 30 under the current bioinformatic thresholds.

31

32 **Supplementary Table 2:** Macroinvertebrate families that were considered detected by  
 33 environmental DNA, but not detected in our 2012 kicknet sample

| Family                | a   | ab | b  | c  | cd | d  | e | f | Greifensee | Total #<br>Individuals |
|-----------------------|-----|----|----|----|----|----|---|---|------------|------------------------|
| Anthomyiidae/Muscidae |     |    |    |    |    |    |   |   |            | 0                      |
| Brachycentridae       |     |    |    |    |    |    |   |   |            | 0                      |
| Cambaridae            | 1   |    |    |    |    |    |   |   | 3          | 4                      |
| Chrysomelidae         |     |    |    |    |    |    |   |   |            | 0                      |
| Coenagrionidae        |     |    | 17 |    |    | 1  |   |   | 2          | 20                     |
| Corbiculidae          |     |    | 1  |    |    |    |   |   |            | 1                      |
| Culicidae             |     |    |    |    |    |    |   |   |            | 0                      |
| Curculionidae         |     |    |    |    |    |    |   |   |            | 0                      |
| Dolichopodidae        |     |    |    |    |    |    |   |   |            | 0                      |
| Dytiscidae            |     | 1  |    |    |    |    |   |   | 1          | 2                      |
| Ephydriidae           |     |    |    |    |    |    |   |   |            | 0                      |
| Gyrinidae             |     |    |    | 1  |    |    |   |   |            | 1                      |
| Heptageniidae         |     |    |    |    |    |    |   |   |            | 0                      |
| Lestidae              |     |    |    |    |    |    |   |   |            | 0                      |
| Leuctridae            |     |    |    |    |    |    |   |   |            | 0                      |
| Libellulidae          |     |    |    |    |    |    |   |   |            | 0                      |
| Molannidae            |     |    |    |    |    |    |   |   | 1          | 1                      |
| Nepidae               |     |    |    |    |    |    |   |   |            | 0                      |
| Niphargidae           |     |    |    |    |    |    |   |   |            | 0                      |
| Notonectidae          |     |    |    |    |    |    |   |   | 1          | 1                      |
| Perlodidae            |     |    |    |    |    |    |   |   |            | 0                      |
| Philopotamidae        |     |    |    |    |    |    |   |   |            | 0                      |
| Psephenidae           |     |    |    |    |    |    |   |   |            | 0                      |
| Psychomyiidae         | 5   |    |    | 8  |    |    |   | 5 | 9          | 27                     |
| Rhagionidae           |     |    |    |    |    |    |   |   |            | 0                      |
| Rhyacophilidae        | 100 |    | 20 | 11 |    | 21 |   |   |            | 152                    |
| Sialidae              |     |    | 1  |    |    |    |   |   | 2          | 3                      |
| Sisyridae             |     |    |    |    |    |    |   |   |            | 0                      |
| Stratiomyidae         |     |    |    |    |    |    |   |   |            | 0                      |
| Syrphidae             |     |    |    |    |    |    |   |   |            | 0                      |
| Tabanidae             |     |    |    |    |    |    |   |   |            | 0                      |
| Veliidae              |     |    |    |    |    |    |   |   |            | 0                      |

34 Numbers recorded for each site (a, ab, b, c, cd, d, e, and f) as well as in lake Greifensee (of which is  
 35 the headwaters for the river Glatt) represent individuals that were sampled by kicknet samples in  
 36 previous years of monitoring (1995 - 2011)

37 **Supplementary Table 3:** The 33 taxon used to construct mock community.

| <b>Morphological Assignment</b> |              |                  |                 |                |                                        |
|---------------------------------|--------------|------------------|-----------------|----------------|----------------------------------------|
| <b>Phylum</b>                   | <b>Class</b> | <b>Order</b>     | <b>Family</b>   | <b>Habitat</b> | <b>DNA conc (ng/<math>\mu</math>L)</b> |
| Annelida                        | Clitellata   | Arhynchobdellida | Erpobdellidae   | aquatic        | 33.8                                   |
| Annelida                        | Clitellata   | Haplotaxida      | Lumbricidae     | terrestrial    | 49.0                                   |
| Annelida                        | Clitellata   | Rhynchobdellida  | Glossiphoniidae | aquatic        | 40.9                                   |
| Arthropoda                      | Arachnida    | Trombidiformes   | Hygrobatidae    | aquatic        | 3.3                                    |
| Arthropoda                      | Insecta      | Coleoptera       | Coccinellidae   | terrestrial    | 36.0                                   |
| Arthropoda                      | Insecta      | Coleoptera       | Elmidae         | aquatic        | 6.8                                    |
| Arthropoda                      | Insecta      | Diptera          | Chironomidae    | aquatic        | 4.4                                    |
| Arthropoda                      | Insecta      | Diptera          | Drosophilidae   | terrestrial    | 3.4                                    |
| Arthropoda                      | Insecta      | Diptera          | Simuliidae      | aquatic        | 33.0                                   |
| Arthropoda                      | Insecta      | Diptera          | Tabanidae       | aquatic        | 9.1                                    |
| Arthropoda                      | Insecta      | Diptera          | Tipulidae       | aquatic        | 35.4                                   |
| Arthropoda                      | Insecta      | Ephemeroptera    | Baetidae        | aquatic        | 14.6                                   |
| Arthropoda                      | Insecta      | Ephemeroptera    | Ephemerellidae  | aquatic        | 21.8                                   |
| Arthropoda                      | Insecta      | Ephemeroptera    | Heptageniidae   | aquatic        | 17.3                                   |
| Arthropoda                      | Insecta      | Hymenoptera      | Formicidae      | terrestrial    | 4.7                                    |
| Arthropoda                      | Insecta      | Megaloptera      | Sialidae        | aquatic        | 18.7                                   |
| Arthropoda                      | Insecta      | Plecoptera       | Capniidae       | aquatic        | 12.8                                   |
| Arthropoda                      | Insecta      | Plecoptera       | Leuctridae      | aquatic        | 10.3                                   |
| Arthropoda                      | Insecta      | Trichoptera      | Hydropsychidae  | aquatic        | 9.2                                    |
| Arthropoda                      | Insecta      | Trichoptera      | Limnephilidae   | aquatic        | 39.4                                   |
| Arthropoda                      | Insecta      | Trichoptera      | Philopotamidae  | aquatic        | 10.3                                   |
| Arthropoda                      | Insecta      | Trichoptera      | Psychomyiidae   | aquatic        | 4.8                                    |
| Arthropoda                      | Insecta      | Trichoptera      | Rhyacophilidae  | aquatic        | 12.3                                   |
| Arthropoda                      | Malacostraca | Amphipoda        | Crangonyctidae  | aquatic        | 19.8                                   |
| Arthropoda                      | Malacostraca | Amphipoda        | Gammaridae      | aquatic        | 79.5                                   |
| Arthropoda                      | Malacostraca | Amphipoda        | Niphargidae     | aquatic        | 9.0                                    |
| Arthropoda                      | Malacostraca | Decapoda         | Cambaridae      | aquatic        | 60.2                                   |
| Arthropoda                      | Malacostraca | Isopoda          | Asellidae       | aquatic        | 8.4                                    |
| Mollusca                        | Bivalvia     | Veneroida        | Dreissenidae    | aquatic        | 52.0                                   |
| Mollusca                        | Gastropoda   | Basommatophora   | Planorbidae     | aquatic        | 32.6                                   |
| Mollusca                        | Gastropoda   | Hygrophila       | Lymnaeidae      | aquatic        | 60.0                                   |
| Mollusca                        | Gastropoda   | Hygrophila       | Physidae        | aquatic        | 90.8                                   |
| Mollusca                        | Gastropoda   | Littorinimorpha  | Hydrobiidae     | aquatic        | 29.4                                   |

38

39 **Supplementary Table 4:** Taxonomic assignments of sequences to references compared with the assignment from blast searches  
 40 against the NCBI nucleotide database

| Reference Assignment |              |                 |                 |             |                                   |                                       | NCBI Assignment |              |                 |                 |                              |                                  |
|----------------------|--------------|-----------------|-----------------|-------------|-----------------------------------|---------------------------------------|-----------------|--------------|-----------------|-----------------|------------------------------|----------------------------------|
| Phylum               | Class        | Order           | Family          | # sequences | Average of % similarity reference | Average of alignment length reference | Phylum2         | Class2       | Order2          | Family2         | Average of % similarity NCBI | Average of alignment length NCBI |
| Annelida             | Clitellata   | Rhynchobdellida | Glossiphoniidae | 2           | 99.9                              | 361.0                                 | Annelida        | Clitellata   | Rhynchobdellida | Glossiphoniidae | 92.5                         | 360.0                            |
|                      |              |                 |                 |             |                                   |                                       |                 |              |                 |                 |                              |                                  |
| Arthropoda           | Insecta      | Coleoptera      | Coccinellidae   | 9571        | 99.5                              | 312.4                                 | Arthropoda      | Insecta      | Coleoptera      | Coccinellidae   | 99.3                         | 312.4                            |
|                      |              |                 |                 |             |                                   |                                       |                 |              |                 |                 |                              |                                  |
| Arthropoda           | Insecta      | Diptera         | Chironomidae    | 122         | 99.6                              | 319.6                                 | Arthropoda      | Insecta      | Diptera         | Chironomidae    | 98.2                         | 319.2                            |
| Arthropoda           | Insecta      | Diptera         | Drosophilidae   | 88          | 99.4                              | 315.5                                 | Arthropoda      | Insecta      | Diptera         | Drosophilidae   | 99.1                         | 315.5                            |
| Arthropoda           | Insecta      | Diptera         | Simuliidae      | 3897        | 98.4                              | 302.6                                 | Arthropoda      | Insecta      | Diptera         | Simuliidae      | 94.7                         | 301.5                            |
| Arthropoda           | Insecta      | Diptera         | Tabanidae       | 1043        | 99.4                              | 304.3                                 | Arthropoda      | Insecta      | Diptera         | Tabanidae       | 93.2                         | 302.6                            |
| Arthropoda           | Insecta      | Diptera         | Tabanidae       | 6           | 99.5                              | 247.7                                 | Arthropoda      | Insecta      | Diptera         | Pipunculinae    | 91.7                         | 246.0                            |
| Arthropoda           | Insecta      | Diptera         | Tabanidae       | 5           | 98.9                              | 246.3                                 | Arthropoda      | Insecta      | Diptera         | Sepsidae        | 92.1                         | 241.7                            |
| Arthropoda           | Insecta      | Diptera         | Tabanidae       | 1           | 99.2                              | 245.0                                 | Arthropoda      | Insecta      | Diptera         | Simuliidae      | 91.0                         | 245.0                            |
|                      |              |                 |                 |             |                                   |                                       |                 |              |                 |                 |                              |                                  |
| Arthropoda           | Insecta      | Ephemeroptera   | Baetidae        | 12719       | 99.7                              | 333.6                                 | Arthropoda      | Insecta      | Ephemeroptera   | Baetidae        | 99.6                         | 333.5                            |
| Arthropoda           | Insecta      | Ephemeroptera   | Ephemerellidae  | 14          | 99.7                              | 327.0                                 | Arthropoda      | Insecta      | Ephemeroptera   | Ephemerellidae  | 91.7                         | 312.6                            |
| Arthropoda           | Insecta      | Ephemeroptera   | Heptageniidae   | 977         | 99.8                              | 323.7                                 | Arthropoda      | Insecta      | Ephemeroptera   | Heptageniidae   | 97.5                         | 323.4                            |
| Arthropoda           | Insecta      | Hymenoptera     | Formicidae      | 368         | 99.8                              | 307.3                                 | Arthropoda      | Insecta      | Hymenoptera     | Formicidae      | 97.6                         | 306.7                            |
| Arthropoda           | Insecta      | Megaloptera     | Sialidae        | 9234        | 99.8                              | 321.4                                 | Arthropoda      | Insecta      | Megaloptera     | Sialidae        | 98.9                         | 321.3                            |
| Arthropoda           | Insecta      | Plecoptera      | Capniidae       | 686         | 99.6                              | 319.5                                 | Arthropoda      | Insecta      | Plecoptera      | Capniidae       | 93.4                         | 317.6                            |
| Arthropoda           | Insecta      | Plecoptera      | Leuctridae      | 3           | 99.6                              | 243.0                                 | Arthropoda      | Insecta      | Diptera         | Chironomidae    | 90.3                         | 229.3                            |
| Arthropoda           | Insecta      | Plecoptera      | Leuctridae      | 3           | 99.6                              | 240.0                                 | Arthropoda      | Insecta      | Diptera         | Lonchaeidae     | 90.4                         | 229.5                            |
| Arthropoda           | Insecta      | Plecoptera      | Leuctridae      | 1           | 96.4                              | 247.0                                 | Arthropoda      | Insecta      | Diptera         | Tabanidae       | 90.3                         | 247.0                            |
| Arthropoda           | Insecta      | Plecoptera      | Leuctridae      | 1           | 97.4                              | 302.0                                 | Arthropoda      | Insecta      | Lepidoptera     | Notodontidae    | 90.3                         | 267.0                            |
|                      |              |                 |                 |             |                                   |                                       |                 |              |                 |                 |                              |                                  |
| Arthropoda           | Insecta      | Trichoptera     | Limnephilidae   | 382         | 99.7                              | 299.7                                 | Arthropoda      | Insecta      | Trichoptera     | Limnephilidae   | 90.4                         | 297.3                            |
| Arthropoda           | Insecta      | Trichoptera     | Philopotamidae  | 553         | 99.7                              | 259.0                                 | Arthropoda      | Insecta      | Trichoptera     | Philopotamidae  | 90.5                         | 244.0                            |
| Arthropoda           | Insecta      | Trichoptera     | Psychomyiidae   | 3           | 99.9                              | 363.5                                 | Arthropoda      | Insecta      | Trichoptera     | Psychomyiidae   | 90.1                         | 359.5                            |
|                      |              |                 |                 |             |                                   |                                       |                 |              |                 |                 |                              |                                  |
| Arthropoda           | Malacostraca | Amphipoda       | Crangonyctidae  | 10          | 99.7                              | 331.2                                 | Arthropoda      | Malacostraca | Amphipoda       | Crangonyctidae  | 99.8                         | 329.1                            |
| Arthropoda           | Malacostraca | Amphipoda       | Gammaridae      | 1           | 99.6                              | 261.0                                 | Arthropoda      | Malacostraca | Amphipoda       | Gammaridae      | 94.6                         | 261.0                            |
|                      |              |                 |                 |             |                                   |                                       |                 |              |                 |                 |                              |                                  |
| Arthropoda           | Malacostraca | Decapoda        | Cambaridae      | 13          | 99.4                              | 309.5                                 | Arthropoda      | Malacostraca | Decapoda        | Cambaridae      | 97.6                         | 307.6                            |
| Arthropoda           | Malacostraca | Isopoda         | Asellidae       | 95          | 99.8                              | 311.7                                 | Arthropoda      | Malacostraca | Isopoda         | Asellidae       | 97.4                         | 311.4                            |
| Mollusca             | Bivalvia     | Veneroida       | Dreissenidae    | 388         | 99.8                              | 323.4                                 | Mollusca        | Bivalvia     | Veneroida       | Dreissenidae    | 99.1                         | 323.4                            |
| Mollusca             | Gastropoda   | Basommatophora  | Planorbidae     | 4           | 99.2                              | 329.2                                 | Mollusca        | Gastropoda   | Basommatophora  | Planorbidae     | 92.3                         | 328.5                            |
| Mollusca             | Gastropoda   | Hygrophila      | Lymnaeidae      | 7208        | 99.8                              | 308.6                                 | Mollusca        | Gastropoda   | Hygrophila      | Lymnaeidae      | 91.8                         | 301.9                            |
| Mollusca             | Gastropoda   | Hygrophila      | Physidae        | 9245        | 99.7                              | 315.8                                 | Mollusca        | Gastropoda   | Hygrophila      | Physidae        | 97.9                         | 311.0                            |
| Mollusca             | Gastropoda   | Littorinimorpha | Hydrobiidae     | 998         | 99.8                              | 324.8                                 | Mollusca        | Gastropoda   | Littorinimorpha | Hydrobiidae     | 98.5                         | 324.5                            |

41 Grey bars inserted to align with taxa not detected from Supplementary Table 3.



42 **Supplementary Table 5:** Number of taxa recovered and sequences assigned correctly or  
 43 incorrectly relative to the reference sequences used in the mock community

| <b>Taxon level</b>                            | <b># taxa</b>      | <b>% of total</b> |
|-----------------------------------------------|--------------------|-------------------|
| Correctly recovered and assigned              | 25                 | 76                |
| Not recovered                                 | 8                  | 24                |
| Incorrectly assigned                          | 2                  | 8                 |
| Total taxa in mock community                  | 33                 |                   |
|                                               |                    |                   |
| <b>Sequence level</b>                         | <b># sequences</b> | <b>% of total</b> |
| Correctly assigned                            | 57621              | 99.97             |
| Incorrectly assigned                          | 20                 | 0.03              |
| Total Sequences after bioinformatic filtering | 57641              |                   |

44

45

46 **Supplementary Table 6:** Annual bioassessment costs in millions of US dollars for freshwater  
 47 resources

| <b>Target Group</b>   | <b>USA<sup>1</sup></b> | <b>England<sup>2</sup></b> | <b>Switzerland<sup>3</sup></b> |
|-----------------------|------------------------|----------------------------|--------------------------------|
| Fish                  | 31.4 - 58.2            | NA                         | 0.35 (0.33 CHF)                |
| Benthic invertebrates | 38.1 - 70.7            | NA                         | 0.61 (0.58 CHF)                |
| Algae (diatoms)       | 34.7 - 64.5            | NA                         | 0.32 (0.3 CHF)                 |
| Macrophytes           | NA                     | NA                         | 0.3 (0.29 CHF)                 |
| Total                 | 104.2 - 193.4          | 11.6 (7.3£)                | 1.58 (1.5 CHF)                 |

48 Information not available is abbreviated as NA. Original currency in brackets. Sources: <sup>1</sup>; <sup>2</sup>  
 49 Richard Walmsley, Forestry Commission personal communication; <sup>3</sup> Markus Wüest, Federal  
 50 Office for the Environment FOEN personal communication

51

52

53

54

55

56

**Supplementary Table 7:** Description of sites and mock community FASTq file names for raw sequence data generated and used in this study

| Site name | File name                   | MD5                              | BioSample name | Alias             |
|-----------|-----------------------------|----------------------------------|----------------|-------------------|
| A         | 02-01_S12_L001_R1_001.fastq | 000d11b208acfbaa28c0c3ef9f36a4ed | SAMN03946218   | Site A 02-01_S12  |
| A         | 02-01_S12_L001_R2_001.fastq | 572038d5e92ee7c465d9ebe16b9f5af5 | SAMN03946218   | Site A 02-01_S12  |
| AB        | 08-01_S18_L001_R1_001.fastq | 3715cf40a0ffabd3bdc3ebdec622e7f9 | SAMN03946320   | Site AB 08-01_S18 |
| AB        | 08-01_S18_L001_R2_001.fastq | 6a501fc3fc84a379219667e5bf03a279 | SAMN03946320   | Site AB 08-01_S18 |
| B         | 07-01_S17_L001_R1_001.fastq | fde4163fe9c00b89b449d3fb735adfd8 | SAMN03946319   | Site B 07-01_S17  |
| B         | 07-01_S17_L001_R2_001.fastq | b9eb9d61c2f49a32b958507dc65a18e9 | SAMN03946319   | Site B 07-01_S17  |
| C         | 03-01_S13_L001_R1_001.fastq | 40c15149f687d7d8d5716d575785c838 | SAMN03946321   | Site C 03-01_S13  |
| C         | 03-01_S13_L001_R2_001.fastq | 1de1051f38598c17f59fe361cc6967d4 | SAMN03946321   | Site C 03-01_S13  |
| CD        | 01-01_S11_L001_R1_001.fastq | 1581c18f4e689458b97b992f61f9bb33 | SAMN03946322   | Site CD 01-01_S11 |
| CD        | 01-01_S11_L001_R2_001.fastq | 3102621c3a5731e412d14b12bd85336e | SAMN03946322   | Site CD 01-01_S11 |
| D         | 04-01_S14_L001_R1_001.fastq | 549907979e502830c1aab1fc4cca0024 | SAMN03946323   | Site D 04-01_S14  |
| D         | 04-01_S14_L001_R2_001.fastq | 2f4344d766fc94f4065e3803f99dc770 | SAMN03946323   | Site D 04-01_S14  |
| E         | 05-01_S15_L001_R1_001.fastq | 1bcbab94440db04da4d65549d1e947b6 | SAMN03946324   | Site E 05-01_S15  |
| E         | 05-01_S15_L001_R2_001.fastq | 994a6a41011ecda2cf3071b61535d470 | SAMN03946324   | Site E 05-01_S15  |
| F         | 06-01_S16_L001_R1_001.fastq | b3fb3f5547c7e1fcd861ece6939a9703 | SAMN03946325   | Site F 06-01_S16  |
| F         | 06-01_S16_L001_R2_001.fastq | 78f258c000c832e89e50ba9fc992c093 | SAMN03946325   | Site F 06-01_S16  |
| MC1-4A    | 4A_S12_L001_R1_001.fastq    | 22348712e5534ebd00602a4363fc5961 | SAMN05017775   | MC PCR 1          |
| MC1-4A    | 4A_S12_L001_R2_001.fastq    | f30f9228f63884e48c81dcd739734439 | SAMN05017775   | MC PCR 1          |
| MC2-4B    | 4B_S13_L001_R1_001.fastq    | 4703ccf6305ed2736e83fe1206fa03e4 | SAMN05017775   | MC PCR 2          |
| MC2-4B    | 4B_S13_L001_R2_001.fastq    | edacf5d3b6892d02fa15bcd868498441 | SAMN05017775   | MC PCR 2          |
| MC3-4D    | 4D_S15_L001_R1_001.fastq    | 252a9e5f38f4f98e2b2adbadc10442d7 | SAMN05017775   | MC PCR 3          |
| MC3-4D    | 4D_S15_L001_R2_001.fastq    | 633e0dcc099394489f6526532a4694dc | SAMN05017775   | MC PCR 3          |

57 Each file's MD5, Sequence Read Archive (SRA) accession number is listed for BioProject PRJNA291617 and the Alias for the sample  
58 names used in the SRA

## 59 **Supplementary Note 1: Mock Community Analysis**

60 Methods:

61 To assess both the robustness of the COI primers used in this study and to understand potential  
62 assignment error when using the NCBI nucleotide database we conducted a mock community  
63 analysis. The mock community was constructed from 33 families of metazoan eukaryotes spanning  
64 three phyla most prominently found in our study (Annelida, Arthropoda and Mollusca,  
65 Supplementary Table 3) and reflecting the taxa to be found in the traditional approach. These taxa  
66 also represent a diversity in aquatic and terrestrial habitat use. All taxa are from families we detect  
67 in our eDNA analysis. DNA was extracted from tissue using the DNeasy blood and tissue kit  
68 (Qiagen, Inc. Valencia, CA, USA) following the recommended manufacturer's protocol and  
69 quantified using the Qubit Broad Range dsDNA DNA Assay (Agilent Technologies, Santa Clara,  
70 CA, USA). Each taxon's DNA was then Sanger sequenced to generate a reference library following  
71 that of Mächler et al. <sup>1</sup>. 2 uL from each taxon at the concentration of their DNA extraction were  
72 subsequently pooled into a single mixture and was used as template for PCR and sequencing. We  
73 chose this method of pooling since in many cases the whole specimen was used for the extraction  
74 and thus DNA concentration is likely relative to body mass. PCR and library preparation followed  
75 exactly the protocol used for processing the environmental samples except that PCR replicates were  
76 not pooled and were separately indexed. Bioinformatics filtering of the raw reads followed exactly  
77 the same pipeline except reads at step C in the workflow (Supplementary Fig. 1) were mapped to the  
78 reference sequences. Sequences were then assigned using the blast algorithm to the newly generated  
79 reference sequences to ascertain the assignment length for each sequence and the percent similarity it  
80 had with the reference sequence. Sequences were then processed the same as for the environmental  
81 samples (steps D and E, Supplementary Fig. 1) and assigned taxonomic information based on the

82 exact NCBI nucleotide database build on March 12, 2013 16:52:31 used for all our other  
83 assignments in the manuscript. The resulting sequences were summarized across PCR replicates by  
84 their taxonomic assignments by totaling the number of sequences from any PCR replicate and taking  
85 the average for assignment statistics of these sequences. The same set of sequences were also  
86 compared against the tissue generated DNA sequences and their assignment were also summarized  
87 across PCR replicates by their taxonomic assignments by totaling the number of sequences from any  
88 PCR replicate and taking the average for assignment statistics of these sequences. (Supplementary  
89 Table 4).

90 Discussion:

91 The analysis of the mock community sheds light on the precision and accuracy of our primers to  
92 adequately assess biodiversity of metazoan eukaryotes. First, we recovered three fourths of the taxa  
93 pooled for the mock community assessment and recovered all three phyla inclusive of both aquatic  
94 and terrestrial taxa confirming our results from eDNA samples from a natural environment. These  
95 results provide strong support that our recovered taxa are not due to contamination in the laboratory  
96 setting or from bioinformatic assignment artifacts and that our workflow is capable of recovering  
97 taxa that are known to be present. However, several taxa were missed and this could be due to many  
98 reasons, such as primer bias<sup>2</sup>. Therefore, it is clear that a single primer set is not going to achieve  
99 full accuracy for description of DNA found in an eDNA sample, as is discussed in the main  
100 manuscript.

101 We did detect some assignment errors when comparing assignments of sequences to the reference  
102 sequence generated from the tissue extracted DNA to that of comparisons to the NCBI nucleotide  
103 database. Specifically, we used the exact criteria used to assign taxonomic information to our eDNA  
104 generated sequences by assigning the NCBI's top hit with the thresholds set for including a

105 taxonomic assignment (bit score of 100, alignment length greater than 100 bp and greater than 90 %  
106 similarity). The error in assignment of any sequence was extremely low at 0.03% of the total  
107 sequences analyzed and from a taxonomic perspective resulted in an 8% (2/25) error rate  
108 (Supplementary Table 5).

109 However, this rate of miss-assignment is very low when compared to error rates reported from  
110 classic identifications: morphological identification of specimens from a similar taxonomic list of  
111 macroinvertebrates is reported to vary between 22.1 and 33.8 % at the family level between  
112 identifiers from different laboratories<sup>3,4</sup>. Therefore, in comparison our sequence based identification  
113 has already the potential to improve identification error rates by two to four-fold. The difference in  
114 the average percent similarity in assignment at the family level between the reference sequence and  
115 NCBI's nucleotide database signifies there are gaps in the database (see also discussion highlighting  
116 this aspect in the main manuscript). Furthermore, using a 90% similarity threshold was able to  
117 achieve a correct assignment to the family level for three mock community taxa (Limnephilidae,  
118 Philopotamidae, Psychomyiidae, (Supplementary Table 4) indicating that increasing this stringency  
119 would create just as many false negative assignments as that for false positive assignments.

120 Thus, we have likely achieved the best possible balance between type I and type II error. We have  
121 added the above points to the discussion in the main manuscript in support of these observations  
122 from our mock community analysis.

123

124

125 **Supplementary References**

- 126 1 Mächler, E., Deiner, K., Steinmann, P. & Altermatt, F. Utility of Environmental DNA for  
127 Monitoring Rare and Indicator Macroinvertebrate Species. *Freshwater Science* **33**, 1174-  
128 1183, doi:10.1086/678128 (2014).
- 129 2 Elbrecht, V. & Leese, F. Can DNA-based ecosystem assessments quantify species  
130 abundance? Testing primer bias and biomass-sequence relationships with an innovative  
131 metabarcoding protocol. *PeerJ PrePrints* **3**, e1258 (2015).
- 132 3 Haase, P., Pauls, S. U., Schindehütte, K. & Sundermann, A. First audit of macroinvertebrate  
133 samples from an EU Water Framework Directive monitoring program: human error greatly  
134 lowers precision of assessment results. *Journal of the North American Benthological Society*  
135 **29**, 1279-1291, doi:10.1899/09-183.1 (2010).
- 136 4 Stribling, J. B., Pavlik, K. L., Holdsworth, S. M. & Leppo, E. W. Data quality, performance,  
137 and uncertainty in taxonomic identification for biological assessments. *Journal of the North*  
138 *American Benthological Society* **27**, 906-919, doi:10.1899/07-175.1 (2008).
